# Supplementary material for: Vitamin D Status in Patients with Primary Antiphospholipid Syndrome (PAPS): A Systematic Review and Meta-Analysis
Source: Antibodies (Basel). 2024 Mar 13;13(1):22. doi: 10.3390/antib13010022 (PMC10967307; doi:10.3390/antib13010022)
Supplement: Supplementary file 1 [file antibodies-13-00022-s001.zip]

Archive with 7 entries (7 files):
- Figure S1_Thrombotic prevalence.pdf
- Figure S2_Sensitivity analyses.pdf
- Table S1_MOOSE checklist.pdf
- Table S2_PRISMA checklist.pdf
- Table S3_Search strategies.pdf
- Table S4_Quality assessment of Case-control studies.pdf
- Table S5_Quality assessment of Cross-sectional studies.pdf
